# Supplementary material for: Methods for the strategic review of programmes for integrated management of childhood illness and community cases
Source: PubMed Central journal article supplement (PMC6063343; doi:10.1136/bmj.k2989), 2018-07-30
Supplement: dals40542.ww1.pdf [file dals40542.ww1.pdf]

## Appendix 1: Methodology & sources of data for the Strategic Review

This appendix presents additional information on the methodology and data sources of the 2016 WHO/UNICEF Strategic Review of IMCI and iCCM. These data sources, in addition to the overall research protocol for the review, can be accessed by clicking [here](#).

### Literature & desk reviews

1. "IMCI evolution and timeline"  
*Cathy Wolfheim, Bernadette Daelmans, Samira Aboubaker*
2. "Integrated Management of Childhood Illness (IMCI) in the 21st Century: Present situational analysis, integration into health systems and innovations" (UNICEF working paper)  
*Igor Rudan, Smruti Patel, Donald Waters, Kerri Wazny, Iain Campbell, Devi Sridhar, Mickey Chopra and Harry Campbell*
3. "Review of the Literature for the Strategic Review (published & unpublished)" (Excel file)  
*Guilhem Labadie*
4. "Adaptations to IMCI 2006-2016"  
*Eva Kudlova*
5. "Innovations in the World Health Organization diagnostic and treatment guidelines for newborns and children"  
*W. Chris Buck, Nichola Connell, Michelle Eckerle, Azadeh Farzin, Amy Ginsburg, Carlos Grijalva-Eternod, Matthew S. Kelly, Marko Kerac, Marie McGrath, Rashmi Patil, Michele Usuelli, and Eric D. McCollum*
6. "Health Care Provider Performance Review: Identifying strategies to improve health worker performance, increase utilization of health services, and reduce mortality in LMIC"  
*Guilhem Labadie with Alexander Rowe*
7. "Information and Communication Technologies to Advance Child Health"  
*Smisha Agarwal and Alain B. Labrique*
8. "Engaging the Private Sector for Delivery of Child Health Interventions: The role of IMCI"  
*Phyllis Awor*
9. "Predictions/recommendations for future IMCI taking into account mortality reductions and changing causes of death as well as etiologies within the major killers"  
*Eric Simoes and Sandy Gove*
10. "Building on Community-IMCI: Community approaches that strengthen the capabilities of individuals, families and communities to improve child health in high-mortality settings"  
*Audrey Prost*
11. "Tools and Strategies for Child Health and Survival in Humanitarian Emergencies: Current Practices and Needs"  
*Simran Chaudhri*
12. "Mapping Global Leadership in Child Health" (USAID/MCSP report)

Mary E. Taylor, Renata Schumacher, and Nicole Davis

### **Global key informant interviews**

13. “Global key informant interviews for the Strategic Review – Synthesis report”  
*Jennifer Franz-Vasdeki*

### **Global survey of IMCI and iCCM implementation**

14. IMCI Global Implementation Survey Report  
*Cynthia Boschi-Pinto, Dilip Thandassery, Samira Aboubaker, Wilson Were, Bernadette Daelmans, Eva Kudlova*

### **Quantitative analyses of DHS and other sources**

15. “Global trends in care-seeking by IMCI and iCCM implementation”  
*Cesar Victora and Aluisio Barros*
16. “Mapping and GIS Analysis of IMCI programming and child health outcomes: Ethiopia, Nigeria and the DRC”  
*Elisabeth Root and Eric Simoes*
17. “Analysis of DHS data on care-seeking: Ethiopia, Nigeria, DRC, India”  
*Saverio Bellizzi*

### **Country assessments**

18. Bangladesh  
*Ashok Patwari, Tahmina Begum and Rabeya Khatoon*
19. Democratic Republic of the Congo  
*Youssouf Gamatié, Celestin Nsibu and Brigitte Kini*
20. Ethiopia  
*Samira Aboubaker, Abiy Seifu Estifanos and Sarah DalGLISH*
21. India  
*Sutapa B Neogi, Monika Chauhan*
22. Kazakhstan  
*Aigul Kuttumuratova, Gaukhar Abuova*
23. Myanmar  
*Elizabeth Mason, Thwe Thwe Win, Anoma Jayathilaka*
24. Nepal  
*Ram Bhandari, Benu Bahadur Karki, Jyoti Ratna Dhakwa, Bijeta Bhandari, Eric Simoes*
25. Nigeria  
*Andrew Mbewe, Robinson Wammanda and Sarah DalGLISH*
26. Yemen  
*Huda Al-Naggar*

### **Vignettes of successful interventions**

27. Burkina Faso: “Story of REC” (electronic tablet tool)  
*Olga Agbodjan-Prince, Fousséni Dao, Noël Adannou Zonon*
28. Egypt: “A systematic approach for implementing IMCI”  
*Suzanne Farhoud*
29. WHO Eastern Mediterranean Region: “IMCI pre-service education: a unique experience”  
*Suzanne Farhoud*

30. Kyrgyzstan: “Implementation of the Pocket book led to improving quality of care for children and reducing unnecessary hospitalizations”  
*Venera Shukurova*
31. Malawi: “Sustaining Our Investments in cStock: Sustaining Gains in Child Health”  
*Humphreys Nsona, Leslie Mgalula and Amos Misomali*
32. Pakistan: “Sehat Ki Dastak: Health Knocking at the Door”  
*Durdana Poonam*
33. Peru: “Results-based budgeting programmes for maternal and child health”  
*Luis Huicho and Jessica Niño de Guzman*
34. Sudan: “Scaling of IMCI Interventions During Emergency: A case study from Darfur”  
*Sumaia Mohamed Alfadil*
